# Supplementary material for: Gas phase synthesis of fcc-cobalt nanoparticles
Source: Royal Society of Chemistry journal article supplement (doi:10.1039/b601013j), 2006-01-01
Supplement: b601013j.pdf [file b601013j.pdf]

Supplementary material (ESI) for Journal of Materials Chemistry  
This journal is © The Royal Society of Chemistry 2006

Electronic supplementary information

## **Gas phase synthesis of fcc-cobalt nanoparticles**

Robert N. Grass and Wendelin J. Stark\*

### Original flame spray system

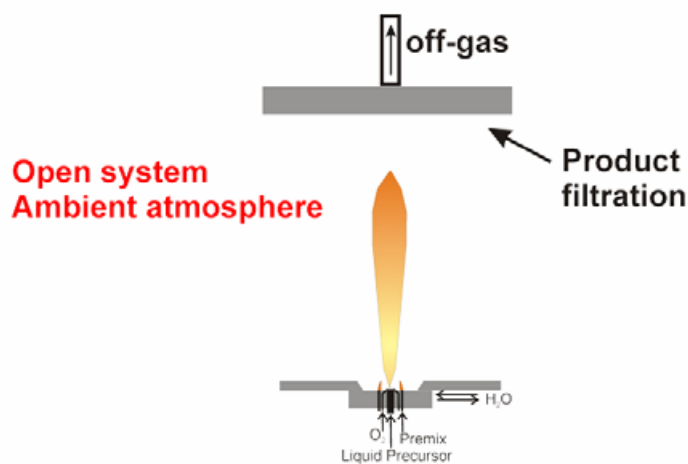

### Modified flame spray system

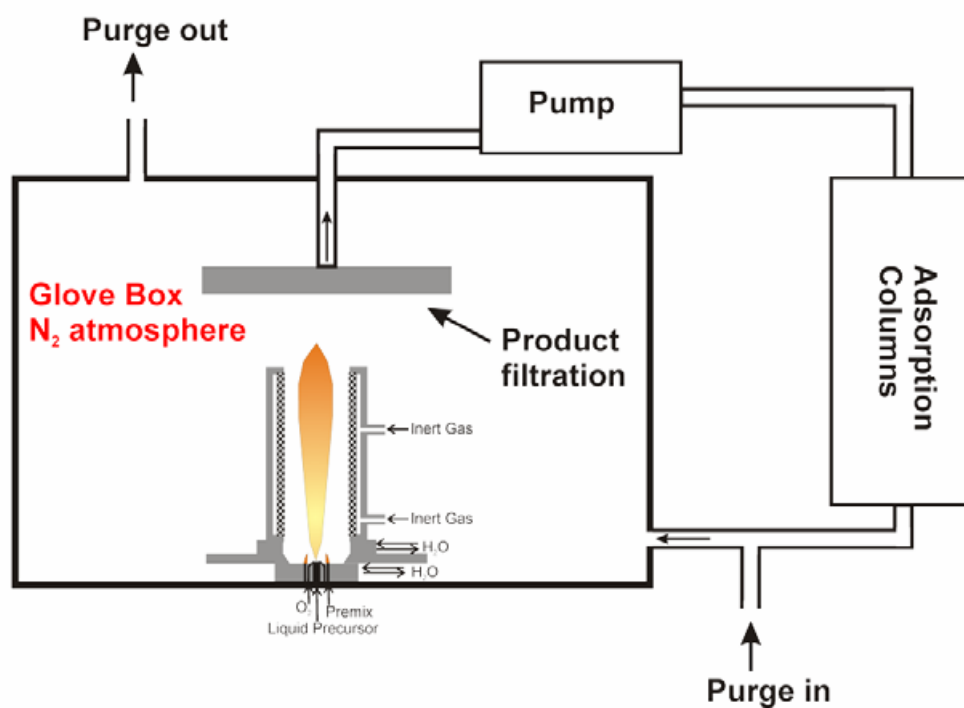

Fig. S1 Schematic showing both the original flame spray set up used for run 4 (top) and the modified reducing flame spray set-up used for runs 1-3 (bottom).
